# Supplementary material for: Underlying Mechanisms of Brain Aging and Neurodegenerative Diseases as Potential Targets for Preventive or Therapeutic Strategies Using Phytochemicals
Source: MDPI journal article supplement (doi:10.3390/nu15153456), 2023-08-04
Supplement: s1 [file s1]

**Supplementary Table S1.** Number of articles reviewed in PubMed for this work using each primary key words plus one of the secondary key words.

|                     | Secondary key words |            |            |                |
|---------------------|---------------------|------------|------------|----------------|
| Primary key word(s) | Gene Expression     | Epigenetic | Microbiome | Total articles |
| Brain Aging         | 458                 | 70         | 40         | 568            |
| Neurodegeneration   | 520                 | 56         | 31         | 607            |
| Alzheimer's disease | 660                 | 92         | 71         | 823            |
| Parkinson's disease | 370                 | 42         | 58         | 470            |
| Total articles      | 2008                | 260        | 200        | <b>2468</b>    |
